# Supplementary material
Source: HighWire-hosted journal article supplement (https://www.rcpjournals.org/highwire/filestream/11643/field_highwire_adjunct_files/2/Reschen_Supplementary_material_S3.pdf)
Supplement: Reschen_Supplementary_material_S3.pdf [file Reschen_Supplementary_material_S3.pdf]

## Supplementary material S3 – Tables S1–S3

**Supplementary Table S1. Mean monthly rate of admission from AEC to inpatient bed or from EAU to inpatient bed for the duration of the study.**

| Top 20 most common ICD-10 primary diagnoses (3 digits) on AEC         | EAU monthly admission rate (%) | AEC monthly admission rate (%) |
|-----------------------------------------------------------------------|--------------------------------|--------------------------------|
| Acute kidney failure                                                  | 75.93                          | 24.05                          |
| Pneumonia, unspecified organism                                       | 67.70                          | 20.38                          |
| Heart failure                                                         | 70.78                          | 19.67                          |
| Other disorders of urinary system                                     | 56.96                          | 16.34                          |
| Other chronic obstructive pulmonary disease                           | 59.19                          | 14.25                          |
| Pulmonary embolism                                                    | 63.09                          | 13.63                          |
| Other disorders of fluid, electrolyte and acid–base balance           | 48.85                          | 12.08                          |
| Phlebitis and thrombophlebitis                                        | 38.67                          | 9.10                           |
| Cellulitis and acute lymphangitis                                     | 59.63                          | 9.00                           |
| Atrial fibrillation and flutter                                       | 35.67                          | 5.99                           |
| Syncope and collapse                                                  | 29.14                          | 5.68                           |
| Abdominal and pelvic pain                                             | 25.68                          | 5.37                           |
| Iron deficiency anaemia                                               | 63.47                          | 3.62                           |
| Unspecified acute lower respiratory infection                         | 38.66                          | 3.58                           |
| Headache                                                              | 19.89                          | 3.15                           |
| Viral infection of unspecified site                                   | 17.65                          | 2.74                           |
| Pain in throat and chest                                              | 10.64                          | 1.10                           |
| Other and unspecified soft tissue disorders, not elsewhere classified | 25.50                          | 0.94                           |
| Abnormalities of heartbeat                                            | 23.79                          | 0.56                           |
| Abnormalities of breathing                                            | 17.54                          | 0.45                           |

**Supplementary Table S2. Mean monthly 30-day mortality stratified by primary diagnosis for the duration of the study.**

| <b>Top 20 most common ICD-10 (3 digits) primary diagnosis on AEC</b>  | <b>Non-ambulatory 30-day mortality (%)</b> | <b>AEC 30-day mortality (%)</b> |
|-----------------------------------------------------------------------|--------------------------------------------|---------------------------------|
| Acute kidney failure                                                  | 16.74                                      | 5.20                            |
| Other chronic obstructive pulmonary disease                           | 8.02                                       | 4.83                            |
| Heart failure                                                         | 15.82                                      | 4.11                            |
| Pneumonia, unspecified organism                                       | 19.24                                      | 3.86                            |
| Iron deficiency anaemia                                               | 2.17                                       | 2.78                            |
| Other disorders of fluid, electrolyte and acid–base balance           | 4.31                                       | 2.03                            |
| Pulmonary embolism                                                    | 8.24                                       | 1.74                            |
| Unspecified acute lower respiratory infection                         | 7.05                                       | 1.28                            |
| Other and unspecified soft tissue disorders, not elsewhere classified | 0.00                                       | 1.18                            |
| Atrial fibrillation and flutter                                       | 1.88                                       | 0.71                            |
| Other disorders of urinary system                                     | 4.54                                       | 0.65                            |
| Cellulitis and acute lymphangitis                                     | 4.24                                       | 0.56                            |
| Abnormalities of breathing                                            | 2.55                                       | 0.39                            |
| Syncope and collapse                                                  | 1.21                                       | 0.38                            |
| Pain in throat and chest                                              | 0.54                                       | 0.12                            |
| Abdominal and pelvic pain                                             | 4.61                                       | 0.00                            |
| Abnormalities of heartbeat                                            | 0.65                                       | 0.00                            |
| Headache                                                              | 0.29                                       | 0.00                            |
| Phlebitis and thrombophlebitis                                        | 5.97                                       | 0.00                            |
| Viral infection of unspecified site                                   | 0.00                                       | 0.00                            |

**Supplementary Table S3. Mean monthly 30-day readmission rate stratified by primary diagnosis for the duration of the study.**

| <b>Top 20 most common ICD-10 (3 digits) primary diagnosis on AEC</b>  | <b>Non-ambulatory 30-day readmission rate (%)</b> | <b>AEC 30-day readmission rate (%)</b> |
|-----------------------------------------------------------------------|---------------------------------------------------|----------------------------------------|
| Acute kidney failure                                                  | 19.73                                             | 16.81                                  |
| Other chronic obstructive pulmonary disease                           | 28.34                                             | 16.04                                  |
| Other disorders of urinary system                                     | 19.93                                             | 12.48                                  |
| Other disorders of fluid, electrolyte and acid-base balance           | 20.09                                             | 10.56                                  |
| Pneumonia, unspecified organism                                       | 19.39                                             | 10.54                                  |
| Heart failure                                                         | 22.05                                             | 8.71                                   |
| Unspecified acute lower respiratory infection                         | 18.77                                             | 6.40                                   |
| Syncope and collapse                                                  | 8.58                                              | 6.21                                   |
| Cellulitis and acute lymphangitis                                     | 23.65                                             | 6.09                                   |
| Atrial fibrillation and flutter                                       | 17.69                                             | 6.00                                   |
| Phlebitis and thrombophlebitis                                        | 23.17                                             | 5.51                                   |
| Iron deficiency anaemia                                               | 15.32                                             | 5.38                                   |
| Pulmonary embolism                                                    | 13.39                                             | 4.67                                   |
| Abnormalities of breathing                                            | 21.47                                             | 4.19                                   |
| Abdominal and pelvic pain                                             | 15.13                                             | 4.10                                   |
| Other and unspecified soft tissue disorders, not elsewhere classified | 9.43                                              | 4.10                                   |
| Headache                                                              | 8.48                                              | 4.01                                   |
| Viral infection of unspecified site                                   | 13.31                                             | 2.17                                   |
| Abnormalities of heartbeat                                            | 14.84                                             | 2.01                                   |
| Pain in throat and chest                                              | 8.61                                              | 1.85                                   |
